# Supplementary material for: Assessing the Causal Relationship of Maternal Height on Birth Size and Gestational Age at Birth: A Mendelian Randomization Analysis
Source: PubMed Central journal article supplement (PMC4540580; doi:10.1371/journal.pmed.1001865), 2015-08-18
Supplement: pmed.1001865.s001.pdf [file pmed.1001865.s001.pdf]

**A**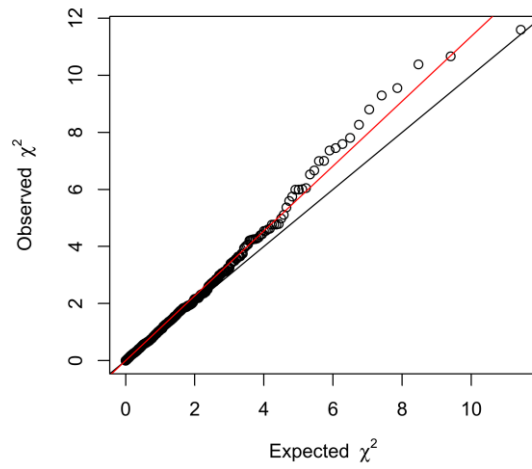**B**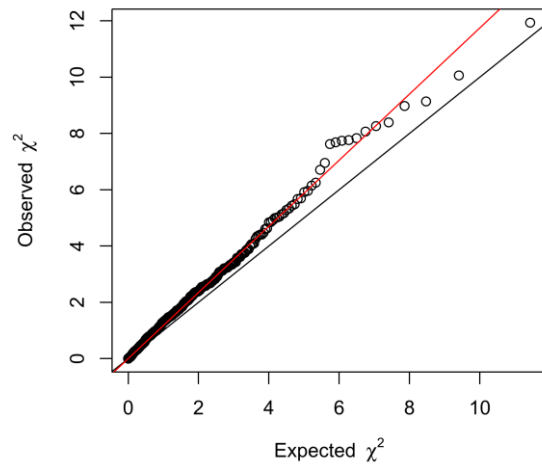

**S1 Figure.** Q-Q plots showing excessive association between adult-height associated SNPs and birth length (A) and birth weight (B) in infants.
