# Supplementary material for: Assessing the Causal Relationship of Maternal Height on Birth Size and Gestational Age at Birth: A Mendelian Randomization Analysis
Source: PubMed Central journal article supplement (PMC4540580; doi:10.1371/journal.pmed.1001865), 2015-08-18
Supplement: pmed.1001865.s002.pdf [file pmed.1001865.s002.pdf]

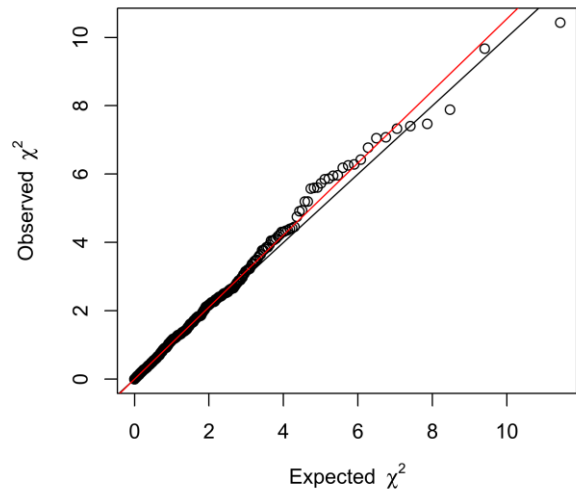

**S2 Figure.** Q-Q plot showing excessive association between adult-height associated SNPs and gestational age.
