# Supplementary material for: Assessing the Causal Relationship of Maternal Height on Birth Size and Gestational Age at Birth: A Mendelian Randomization Analysis
Source: PubMed Central journal article supplement (PMC4540580; doi:10.1371/journal.pmed.1001865), 2015-08-18
Supplement: pmed.1001865.s003.pdf [file pmed.1001865.s003.pdf]

**S1 Table.** Descriptive statistics of maternal phenotypes**FIN**

| Trait  | all   |       |         | normal |       |         | preterm |       |         |
|--------|-------|-------|---------|--------|-------|---------|---------|-------|---------|
|        | mean  | sd    | missing | mean   | sd    | missing | mean    | sd    | missing |
| age    | 31.29 | 4.389 | 0       | 31.43  | 4.202 | 0       | 30.98   | 4.781 | 0       |
| height | 166.5 | 5.869 | 0       | 166.7  | 5.814 | 0       | 166     | 5.972 | 0       |
| weight | 63.91 | 11.24 | 1       | 63.76  | 10.71 | 0       | 64.23   | 12.39 | 1       |
| BMI    | 23.04 | 3.814 | 1       | 22.91  | 3.478 | 0       | 23.33   | 4.483 | 1       |

**MoBa**

| trait  | all   |       |         | normal |       |         | preterm |       |         |
|--------|-------|-------|---------|--------|-------|---------|---------|-------|---------|
|        | mean  | sd    | missing | mean   | sd    | missing | mean    | sd    | missing |
| age    | 28.64 | 3.59  | 0       | 28.97  | 3.426 | 0       | 28.29   | 3.728 | 0       |
| height | 167.9 | 5.845 | 34      | 168.5  | 5.893 | 18      | 167.2   | 5.721 | 16      |
| weight | 67.64 | 12.1  | 46      | 68.11  | 11.79 | 26      | 67.15   | 12.41 | 20      |
| BMI    | 24.02 | 4.197 | 51      | 24     | 4.021 | 28      | 24.03   | 4.379 | 23      |

**DNBC**

| Trait  | all   |       |         | normal |       |         | preterm |       |         |
|--------|-------|-------|---------|--------|-------|---------|---------|-------|---------|
|        | mean  | sd    | missing | mean   | sd    | missing | mean    | sd    | missing |
| age    | 29.56 | 4.185 | 4       | 29.81  | 4.058 | 1       | 29.22   | 4.327 | 3       |
| height | 169   | 6.037 | 82      | 169.5  | 5.912 | 38      | 168.3   | 6.144 | 44      |
| weight | 66.98 | 12.69 | 108     | 67.5   | 12.06 | 51      | 66.28   | 13.47 | 57      |
| BMI    | 23.44 | 4.216 | 109     | 23.5   | 4.014 | 52      | 23.37   | 4.479 | 57      |
