# Supplementary material for: Assessing the Causal Relationship of Maternal Height on Birth Size and Gestational Age at Birth: A Mendelian Randomization Analysis
Source: PubMed Central journal article supplement (PMC4540580; doi:10.1371/journal.pmed.1001865), 2015-08-18
Supplement: pmed.1001865.s004.pdf [file pmed.1001865.s004.pdf]

**S2 Table.** Descriptive statistics of pregnancy outcomes**FIN**

| Pregnancy outcomes | normal |        |         | preterm |       |         |
|--------------------|--------|--------|---------|---------|-------|---------|
|                    | mean   | sd     | missing | mean    | sd    | missing |
| Gestational days   | 282.1  | 6.48   | 0       | 238.5   | 12.38 | 0       |
| Birth weight       | 3578   | 435    | 0       | 2408    | 487.2 | 0       |
| Birth length       | 50.33  | 1.89   | 0       | 45.34   | 2.713 | 2       |
| z-score            | -0.195 | 0.8841 | 0       | -0.1515 | 1.049 | 0       |

**MoBa**

| Pregnancy outcomes | normal |       |         | preterm |       |         |
|--------------------|--------|-------|---------|---------|-------|---------|
|                    | mean   | sd    | missing | mean    | sd    | missing |
| Gestational days   | 280.3  | 3.644 | 0       | 248.2   | 11.34 | 0       |
| Birth weight       | 3690   | 406.9 | 0       | 2743    | 463.4 | 0       |
| Birth length       | 50.59  | 1.981 | 15      | 46.96   | 2.202 | 40      |

**DNBC**

| Pregnancy outcomes | normal |       |         | preterm |       |         |
|--------------------|--------|-------|---------|---------|-------|---------|
|                    | mean   | sd    | missing | mean    | sd    | missing |
| Gestational days   | 282.3  | 3.846 | 0       | 239.8   | 15.44 | 0       |
| Birth weight       | 3702   | 466.8 | 4       | 2457    | 652.9 | 9       |
