# Supplementary material for: Assessing the Causal Relationship of Maternal Height on Birth Size and Gestational Age at Birth: A Mendelian Randomization Analysis
Source: PubMed Central journal article supplement (PMC4540580; doi:10.1371/journal.pmed.1001865), 2015-08-18
Supplement: pmed.1001865.s005.pdf [file pmed.1001865.s005.pdf]

**S3 Table.** Association between maternal genotype and haplotype genetic scores and maternal height

| cohort | Genotype |        |                  |        | Transmitted |        |                 |        | Un-transmitted |        |                 |         |
|--------|----------|--------|------------------|--------|-------------|--------|-----------------|--------|----------------|--------|-----------------|---------|
|        | beta     | se     | p-val            | r2     | beta        | se     | p-val           | r2     | beta           | se     | p-val           | r2      |
| FIN    | 5.667    | 0.3973 | <b>3.48E-41</b>  | 0.2085 | 6.097       | 0.5845 | <b>6.22E-24</b> | 0.1176 | 5.131          | 0.5717 | <b>2.10E-18</b> | 0.08872 |
| MoBa   | 5.536    | 0.3469 | <b>3.82E-51</b>  | 0.2071 | 6.029       | 0.5228 | <b>6.14E-29</b> | 0.1168 | 5.088          | 0.5004 | <b>3.72E-23</b> | 0.09236 |
| DNBC   | 5.8      | 0.2888 | <b>3.62E-80</b>  | 0.2015 | 5.975       | 0.4215 | <b>4.87E-43</b> | 0.1038 | 5.646          | 0.4102 | <b>8.13E-41</b> | 0.09819 |
|        |          |        |                  |        |             |        |                 |        |                |        |                 |         |
| meta   | 5.686    | 0.1938 | <b>2.75E-189</b> |        | 6.02        | 0.2861 | <b>2.89E-98</b> |        | 5.353          | 0.2774 | <b>5.50E-83</b> |         |
| p_het  | 0.8411   |        |                  |        | 0.9856      |        |                 |        | 0.6238         |        |                 |         |
