# Supplementary material for: Assessing the Causal Relationship of Maternal Height on Birth Size and Gestational Age at Birth: A Mendelian Randomization Analysis
Source: PubMed Central journal article supplement (PMC4540580; doi:10.1371/journal.pmed.1001865), 2015-08-18
Supplement: pmed.1001865.s006.pdf [file pmed.1001865.s006.pdf]

**S4 Table.** Association between genotype height genetic scores and pregnancy outcomes

**FIN**

| Genotype score | Birth length |        |                  | Birth weight |       |                 | Gestational age |       |        |
|----------------|--------------|--------|------------------|--------------|-------|-----------------|-----------------|-------|--------|
|                | beta         | se     | p-val            | beta         | se    | p-val           | beta            | se    | p-val  |
| Maternal       | 0.4444       | 0.1342 | <b>0.0009706</b> | 90.59        | 28.89 | <b>0.001776</b> | 0.1101          | 1.671 | 0.9475 |
| Fetal          | 0.5617       | 0.1333 | <b>2.79E-05</b>  | 93.91        | 28.79 | <b>0.001153</b> | -0.4575         | 1.666 | 0.7837 |
| Adjusted       | 0.2033       | 0.1574 | 0.1969           | 56.61        | 33.98 | 0.09611         | 0.4899          | 1.971 | 0.8037 |

**MoBa**

| Genotype score | Birth length |        |                 | Birth weight |       |                 | Gestational age |       |        |
|----------------|--------------|--------|-----------------|--------------|-------|-----------------|-----------------|-------|--------|
|                | beta         | se     | p-val           | beta         | se    | p-val           | beta            | se    | p-val  |
| Maternal       | 0.3274       | 0.1252 | <b>0.00908</b>  | 53.12        | 23.6  | <b>0.0246</b>   | 0.9407          | 1.188 | 0.4285 |
| Fetal          | 0.5104       | 0.1262 | <b>5.68E-05</b> | 76.46        | 24.04 | <b>0.001515</b> | 0.9272          | 1.213 | 0.4448 |
| Adjusted       | 0.07299      | 0.1491 | 0.6245          | 17.69        | 28.04 | 0.5282          | 0.6349          | 1.415 | 0.6538 |

**DNBC**

| Genotype score | Birth length |    |       | Birth weight |       |                 | Gestational age |       |                |
|----------------|--------------|----|-------|--------------|-------|-----------------|-----------------|-------|----------------|
|                | beta         | se | p-val | beta         | se    | p-val           | beta            | se    | p-val          |
| Maternal       | NA           |    |       | 86.67        | 22.73 | <b>0.000142</b> | 2.436           | 1.225 | <b>0.04697</b> |
| Fetal          |              |    |       | 127.6        | 22.78 | <b>2.51E-08</b> | 0.1916          | 1.24  | 0.8772         |
| Adjusted       |              |    |       | 26.07        | 26.83 | 0.3314          | 3.285           | 1.454 | <b>0.02397</b> |
