# Supplementary material for: Assessing the Causal Relationship of Maternal Height on Birth Size and Gestational Age at Birth: A Mendelian Randomization Analysis
Source: PubMed Central journal article supplement (PMC4540580; doi:10.1371/journal.pmed.1001865), 2015-08-18
Supplement: pmed.1001865.s007.pdf [file pmed.1001865.s007.pdf]

**S5 Table.** Association between haplotype genetic scores and pregnancy outcomes

**FIN**

| Haplotype score | Birth length |        |                 | Birth weight |       |                 | Gestational age |       |        |
|-----------------|--------------|--------|-----------------|--------------|-------|-----------------|-----------------|-------|--------|
|                 | beta         | se     | p-val           | beta         | se    | p-val           | beta            | se    | p-val  |
| M1 (C1)         | 0.5911       | 0.1969 | <b>0.002766</b> | 112.7        | 42.4  | <b>0.008025</b> | 0.2925          | 2.449 | 0.905  |
| M2              | 0.3215       | 0.1933 | 0.09677         | 74.4         | 41.57 | 0.0739          | 0.0004433       | 2.395 | 0.9999 |
| C2              | 0.5561       | 0.1895 | <b>0.003444</b> | 79.18        | 40.86 | 0.053           | -1.074          | 2.354 | 0.6485 |

**MoBa**

| Haplotype score | Birth length |        |                 | Birth weight |       |                 | Gestational age |       |        |
|-----------------|--------------|--------|-----------------|--------------|-------|-----------------|-----------------|-------|--------|
|                 | beta         | se     | p-val           | beta         | se    | p-val           | beta            | se    | p-val  |
| M1 (C1)         | 0.483        | 0.1868 | <b>0.009868</b> | 105.2        | 35.16 | <b>0.002846</b> | 0.516           | 1.774 | 0.7712 |
| M2              | 0.2254       | 0.1802 | 0.2111          | 12.23        | 34.04 | 0.7194          | 1.486           | 1.709 | 0.3848 |
| C2              | 0.5585       | 0.1767 | <b>0.001624</b> | 53.13        | 33.48 | 0.1129          | 1.347           | 1.683 | 0.4235 |

**DNBC**

| Haplotype score | Birth length |    |       | Birth weight |       |                 | Gestational age |       |                |
|-----------------|--------------|----|-------|--------------|-------|-----------------|-----------------|-------|----------------|
|                 | beta         | se | p-val | beta         | se    | p-val           | beta            | se    | p-val          |
| M1 (C1)         | NA           |    |       | 199.2        | 32.89 | <b>1.71E-09</b> | 0.8155          | 1.79  | 0.6487         |
| M2              |              |    |       | -13.38       | 32.38 | 0.6795          | 4.106           | 1.738 | <b>0.01824</b> |
| C2              |              |    |       | 64.12        | 32.57 | <b>0.04915</b>  | -0.3333         | 1.758 | 0.8497         |
