# Supplementary material for: Assessing the Causal Relationship of Maternal Height on Birth Size and Gestational Age at Birth: A Mendelian Randomization Analysis
Source: PubMed Central journal article supplement (PMC4540580; doi:10.1371/journal.pmed.1001865), 2015-08-18
Supplement: pmed.1001865.s008.pdf [file pmed.1001865.s008.pdf]

**S6 Table.** Pairwise correlation (p-values) among genetic scores**FIN**

| score    | score_m          | score_m1         | score_m2         | score_c    | score_c1        | score_c2 |
|----------|------------------|------------------|------------------|------------|-----------------|----------|
| score_m  |                  |                  |                  |            |                 |          |
| score_m1 | 0.7206 (0)       |                  |                  |            |                 |          |
| score_m2 | 0.7329 (0)       | 0.0592 (0.09799) |                  |            |                 |          |
| score_c  | 0.5335 (0)       | 0.7087 (0)       | 0.0744 (0.03737) |            |                 |          |
| score_c1 | 0.7206 (0)       | 1.0000 (0)       | 0.0592 (0.09799) | 0.7087 (0) |                 |          |
| score_c2 | 0.0657 (0.06622) | 0.0431 (0.2287)  | 0.0530 (0.1386)  | 0.7333 (0) | 0.0431 (0.2287) |          |

**MoBa**

| score    | score_m          | score_m1         | score_m2           | score_c    | score_c1        | score_c2 |
|----------|------------------|------------------|--------------------|------------|-----------------|----------|
| score_m  |                  |                  |                    |            |                 |          |
| score_m1 | 0.7214 (0)       |                  |                    |            |                 |          |
| score_m2 | 0.7459 (0)       | 0.0769 (0.01413) |                    |            |                 |          |
| score_c  | 0.5448 (0)       | 0.6945 (0)       | 0.1171 (0.0001808) |            |                 |          |
| score_c1 | 0.7214 (0)       | 1.0000 (0)       | 0.0769 (0.01413)   | 0.6945 (0) |                 |          |
| score_c2 | 0.0705 (0.02444) | 0.0147 (0.6402)  | 0.0884 (0.004782)  | 0.7294 (0) | 0.0147 (0.6402) |          |

**DNBC**

| score    | score_m           | score_m1        | score_m2          | score_c    | score_c1        | score_c2 |
|----------|-------------------|-----------------|-------------------|------------|-----------------|----------|
| score_m  |                   |                 |                   |            |                 |          |
| score_m1 | 0.7090 (0)        |                 |                   |            |                 |          |
| score_m2 | 0.7273 (0)        | 0.0318 (0.192)  |                   |            |                 |          |
| score_c  | 0.5379 (0)        | 0.7079 (0)      | 0.0733 (0.00262)  |            |                 |          |
| score_c1 | 0.7090 (0)        | 1.0000 (0)      | 0.0318 (0.192)    | 0.7079 (0) |                 |          |
| score_c2 | 0.0664 (0.006406) | 0.0211 (0.3861) | 0.0732 (0.002642) | 0.7209 (0) | 0.0211 (0.3861) |          |
