# Supplementary material for: Assessing the Causal Relationship of Maternal Height on Birth Size and Gestational Age at Birth: A Mendelian Randomization Analysis
Source: PubMed Central journal article supplement (PMC4540580; doi:10.1371/journal.pmed.1001865), 2015-08-18
Supplement: pmed.1001865.s009.pdf [file pmed.1001865.s009.pdf]

**S7 Table.** Results of instrumental variable analysis

**FIN**

| Method   | Birth length |         |                  | Birth weight |       |                 | Gestational age |        |        |
|----------|--------------|---------|------------------|--------------|-------|-----------------|-----------------|--------|--------|
|          | beta         | se      | p-val            | beta         | se    | p-val           | beta            | se     | p-val  |
| Method 1 | 0.07828      | 0.0232  | <b>0.0007387</b> | 15.96        | 4.993 | <b>0.001389</b> | 0.0194          | 0.2935 | 0.9473 |
| Method 2 | 0.04065      | 0.03092 | 0.1886           | 11.34        | 6.674 | 0.0894          | 0.09793         | 0.3921 | 0.8028 |
| Method 3 | 0.05881      | 0.0345  | 0.08825          | 13.6         | 7.421 | 0.06679         | 8.11E-05        | 0.4369 | 0.9999 |
| Method 4 | 0.05265      | 0.03712 | 0.156            | 12.87        | 8.005 | 0.108           | 0.006564        | 0.4717 | 0.9889 |

**MoBa**

| Method   | Birth length |         |                 | Birth weight |       |                | Gestational age |        |        |
|----------|--------------|---------|-----------------|--------------|-------|----------------|-----------------|--------|--------|
|          | beta         | se      | p-val           | beta         | se    | p-val          | beta            | se     | p-val  |
| Method 1 | 0.06086      | 0.02226 | <b>0.006267</b> | 9.617        | 4.29  | <b>0.02497</b> | 0.1906          | 0.2162 | 0.378  |
| Method 2 | 0.0198       | 0.02956 | 0.503           | 3.281        | 5.696 | 0.5646         | 0.1302          | 0.2873 | 0.6504 |
| Method 3 | 0.04244      | 0.03225 | 0.1882          | 1.883        | 6.22  | 0.7621         | 0.2134          | 0.3105 | 0.492  |
| Method 4 | 0.03174      | 0.03566 | 0.3735          | -0.3423      | 6.919 | 0.9605         | 0.2043          | 0.3459 | 0.5548 |

**DNBC**

| Method   | Birth length |    |       | Birth weight |       |                  | Gestational age |        |                 |
|----------|--------------|----|-------|--------------|-------|------------------|-----------------|--------|-----------------|
|          | beta         | se | p-val | beta         | se    | p-val            | beta            | se     | p-val           |
| Method 1 | NA           |    |       | 14.98        | 4.011 | <b>0.0001872</b> | 0.5046          | 0.2139 | <b>0.01833</b>  |
| Method 2 |              |    |       | 4.359        | 5.075 | 0.3904           | 0.7476          | 0.269  | <b>0.005449</b> |
| Method 3 |              |    |       | -3.92        | 5.847 | 0.5026           | 0.864           | 0.302  | <b>0.004224</b> |
| Method 4 |              |    |       | -5.984       | 6.064 | 0.3237           | 0.909           | 0.3156 | <b>0.003974</b> |
