# Supplementary material for: Assessing the Causal Relationship of Maternal Height on Birth Size and Gestational Age at Birth: A Mendelian Randomization Analysis
Source: PubMed Central journal article supplement (PMC4540580; doi:10.1371/journal.pmed.1001865), 2015-08-18
Supplement: pmed.1001865.s010.pdf [file pmed.1001865.s010.pdf]

**S8 Table.** Statistical analyses using gestation adjusted birth weight z-score as outcome

**A. Association between maternal height and birth weight z-score**

| Cohort | Preterm birth risk |          |                 |
|--------|--------------------|----------|-----------------|
|        | beta               | se       | p-val           |
| FIN    | 0.03026            | 0.006361 | 2.33E-06        |
| MoBa   | 0.01747            | 0.005614 | <b>1.91E-03</b> |
| DNBC   | 0.02573            | 0.004304 | <b>2.77E-09</b> |
|        |                    |          |                 |
| meta   | 0.02437            | 0.003009 | <b>5.49E-16</b> |
| p_het  | 0.2912             |          |                 |

**B. Association between genotype height genetic scores and birth weight z-score**

| Genotype score | FIN    |         |                 | MoBa   |         |                 | DNBC    |         |                 | meta    |         |                 |        |
|----------------|--------|---------|-----------------|--------|---------|-----------------|---------|---------|-----------------|---------|---------|-----------------|--------|
|                | beta   | se      | p-val           | beta   | se      | p-val           | beta    | se      | p-val           | beta    | se      | p-val           | p_het  |
| Maternal       | 0.2243 | 0.07583 | <b>0.00319</b>  | 0.1553 | 0.06581 | <b>0.01848</b>  | 0.2005  | 0.05211 | <b>0.000124</b> | 0.1924  | 0.03597 | <b>8.88E-08</b> | 0.7715 |
| Fetal          | 0.2409 | 0.07528 | <b>0.001426</b> | 0.2138 | 0.06706 | <b>0.001477</b> | 0.2984  | 0.05229 | <b>1.36E-08</b> | 0.2605  | 0.03616 | <b>5.85E-13</b> | 0.5832 |
| Adjusted       | 0.1332 | 0.08927 | 0.1361          | 0.0589 | 0.07825 | 0.4518          | 0.05818 | 0.0615  | 0.3442          | 0.07541 | 0.04252 | 0.07611         | 0.7626 |

**C. Association between haplotype genetic scores and birth weight z-score**

| Haplotype score | FIN    |        |               | MoBa    |         |                 | DNBC     |         |                 | meta    |         |                 |        |
|-----------------|--------|--------|---------------|---------|---------|-----------------|----------|---------|-----------------|---------|---------|-----------------|--------|
|                 | beta   | se     | p-val         | beta    | se      | p-val           | beta     | se      | p-val           | beta    | se      | p-val           | p_het  |
| M1 (C1)         | 0.2787 | 0.1113 | <b>0.0125</b> | 0.3034  | 0.09809 | <b>0.002035</b> | 0.4629   | 0.07546 | <b>1.07E-09</b> | 0.3756  | 0.05269 | <b>1.01E-12</b> | 0.2675 |
| M2              | 0.184  | 0.1091 | 0.09213       | 0.03975 | 0.09499 | 0.6757          | -0.03214 | 0.07422 | 0.665           | 0.03727 | 0.05155 | 0.4697          | 0.2614 |
| C2              | 0.2141 | 0.1067 | <b>0.0451</b> | 0.1404  | 0.09345 | 0.1332          | 0.1526   | 0.07479 | <b>0.04152</b>  | 0.1631  | 0.05122 | <b>0.001451</b> | 0.8575 |

**D. Results of instrumental variable analysis\***

| Haplotype score | FIN     |         |                 | MoBa     |         |                | DNBC     |          |                 | meta     |          |                 |        |
|-----------------|---------|---------|-----------------|----------|---------|----------------|----------|----------|-----------------|----------|----------|-----------------|--------|
|                 | beta    | se      | p-val           | beta     | se      | p-val          | beta     | se       | p-val           | beta     | se       | p-val           | p_het  |
| Method 1        | 0.03958 | 0.01313 | <b>0.002565</b> | 0.02778  | 0.0119  | <b>0.01956</b> | 0.03405  | 0.009059 | <b>0.000171</b> | 0.03356  | 0.006318 | <b>1.08E-07</b> | 0.7989 |
| Method 2        | 0.02661 | 0.01751 | 0.1286          | 0.01094  | 0.01584 | 0.4898         | 0.00945  | 0.01141  | 0.4075          | 0.0136   | 0.008184 | 0.09667         | 0.7003 |
| Method 3        | 0.03368 | 0.01952 | 0.0844          | 0.006078 | 0.01722 | 0.7241         | -0.00922 | 0.01316  | 0.4835          | 0.00473  | 0.009218 | 0.6079          | 0.1892 |
| Method 4        | 0.03159 | 0.02109 | 0.1341          | -7.2E-05 | 0.01919 | 0.997          | -0.01398 | 0.01364  | 0.3053          | -0.00042 | 0.009833 | 0.9662          | 0.1927 |
