# Supplementary material for: Assessing the Causal Relationship of Maternal Height on Birth Size and Gestational Age at Birth: A Mendelian Randomization Analysis
Source: PubMed Central journal article supplement (PMC4540580; doi:10.1371/journal.pmed.1001865), 2015-08-18
Supplement: pmed.1001865.s011.pdf [file pmed.1001865.s011.pdf]

**S9 Table.** Statistical analyses using dichotomous preterm birth as outcome

**A. Association between maternal height and preterm birth**

| Cohort | Preterm birth risk |          |                 |
|--------|--------------------|----------|-----------------|
|        | beta               | se       | p-val           |
| FIN    | -0.02555           | 0.01424  | 0.0728          |
| MoBa   | -0.03318           | 0.01178  | <b>4.84E-03</b> |
| DNBC   | -0.02932           | 0.009091 | <b>0.001261</b> |
| meta   | -0.0297            | 0.006423 | <b>3.77E-06</b> |
| p_het  | 0.9167             |          |                 |

**B. Association between genotype genetic scores and preterm birth**

| Genotype score | FIN      |        |        | MoBa     |        |        | DNBC     |        |                | meta     |         |         |        |
|----------------|----------|--------|--------|----------|--------|--------|----------|--------|----------------|----------|---------|---------|--------|
|                | beta     | se     | p-val  | beta     | se     | p-val  | beta     | se     | p-val          | beta     | se      | p-val   | p_het  |
| Maternal       | 0.009925 | 0.1664 | 0.9524 | -0.1059  | 0.1331 | 0.4262 | -0.2039  | 0.1061 | 0.0547         | -0.1308  | 0.07427 | 0.07815 | 0.542  |
| Fetal          | 0.008501 | 0.1655 | 0.959  | -0.1142  | 0.1361 | 0.4014 | 0.003803 | 0.1069 | 0.9716         | -0.03104 | 0.07496 | 0.6788  | 0.7647 |
| Adjusted       | 0.007507 | 0.1956 | 0.9694 | -0.06419 | 0.1585 | 0.6855 | -0.2904  | 0.1262 | <b>0.02141</b> | -0.1599  | 0.08814 | 0.06957 | 0.3386 |

**C. Association between haplotype genetic scores and preterm birth**

| Haplotype score | FIN      |        |        | MoBa    |        |        | DNBC     |        |                | meta     |        |                |        |
|-----------------|----------|--------|--------|---------|--------|--------|----------|--------|----------------|----------|--------|----------------|--------|
|                 | beta     | se     | p-val  | beta    | se     | p-val  | beta     | se     | p-val          | beta     | se     | p-val          | p_het  |
| M1 (C1)         | 0.1119   | 0.2442 | 0.6468 | -0.1129 | 0.1988 | 0.5701 | -0.09547 | 0.1544 | 0.5365         | -0.05932 | 0.1091 | 0.5866         | 0.7338 |
| M2              | -0.09532 | 0.2376 | 0.6883 | -0.1138 | 0.1916 | 0.5524 | -0.3198  | 0.1508 | <b>0.03395</b> | -0.212   | 0.106  | <b>0.04559</b> | 0.6021 |
| C2              | -0.09652 | 0.2337 | 0.6795 | -0.1164 | 0.1887 | 0.5373 | 0.09564  | 0.1518 | 0.5286         | -0.00987 | 0.1055 | 0.9255         | 0.6251 |

**D. Results of instrumental variable analysis**

| Haplotype score | FIN      |         |        | MoBa     |         |        | DNBC     |         |                 | meta     |         |                |        |
|-----------------|----------|---------|--------|----------|---------|--------|----------|---------|-----------------|----------|---------|----------------|--------|
|                 | beta     | se      | p-val  | beta     | se      | p-val  | beta     | se      | p-val           | beta     | se      | p-val          | p_het  |
| Method 1        | 0.001748 | 0.0293  | 0.9524 | -0.02275 | 0.02441 | 0.3514 | -0.03912 | 0.01882 | <b>0.03764</b>  | -0.02587 | 0.01328 | 0.05147        | 0.4965 |
| Method 2        | 0.001501 | 0.0391  | 0.9694 | -0.01494 | 0.0324  | 0.6447 | -0.06167 | 0.0237  | <b>0.009253</b> | -0.03633 | 0.01718 | <b>0.03447</b> | 0.2842 |
| Method 3        | -0.01743 | 0.04344 | 0.6883 | -0.01637 | 0.03505 | 0.6404 | -0.06164 | 0.02644 | <b>0.01973</b>  | -0.03992 | 0.01898 | <b>0.03551</b> | 0.4979 |
| Method 4        | -0.01916 | 0.04693 | 0.6831 | -0.01406 | 0.03906 | 0.7189 | -0.06572 | 0.02769 | <b>0.0176</b>   | -0.04294 | 0.02035 | <b>0.03488</b> | 0.4769 |
